# Supplementary material for: Comparing SVM and ANN based Machine Learning Methods for Species Identification of Food Contaminating Beetles
Source: PubMed Central journal article supplement (PMC5917025; doi:10.1038/s41598-018-24926-7), 2018-04-25
Supplement: 41598_2018_24926_MOESM1_ESM.pdf [file 41598_2018_24926_MOESM1_ESM.pdf]

1 **Comparing SVM and ANN based Machine Learning Methods for Species Identification of**  
2 **Food Contaminating Beetles**

3  
4  
5  
6  
7  
8  
9

Halil Bisgin, Tanmay Bera, Hongjian Ding, Howard G. Semey, Leihong Wu, Zhichao Liu, Amy E. Barnes, Darryl A. Langley, Monica Pava-Ripoll, Himansu J. Vyas, Weida Tong, Joshua Xu

10  
11  
12  
13  
14  
15  
16  
17  
18  
19  
20  
21  
22  
23  
24  
25  
26

27 **Disclaimer:**  
28 The views expressed in this work are those of the authors only and do not necessarily express the  
29 views/policies of the FDA.  
30  
31

1 **Supplementary Information:**

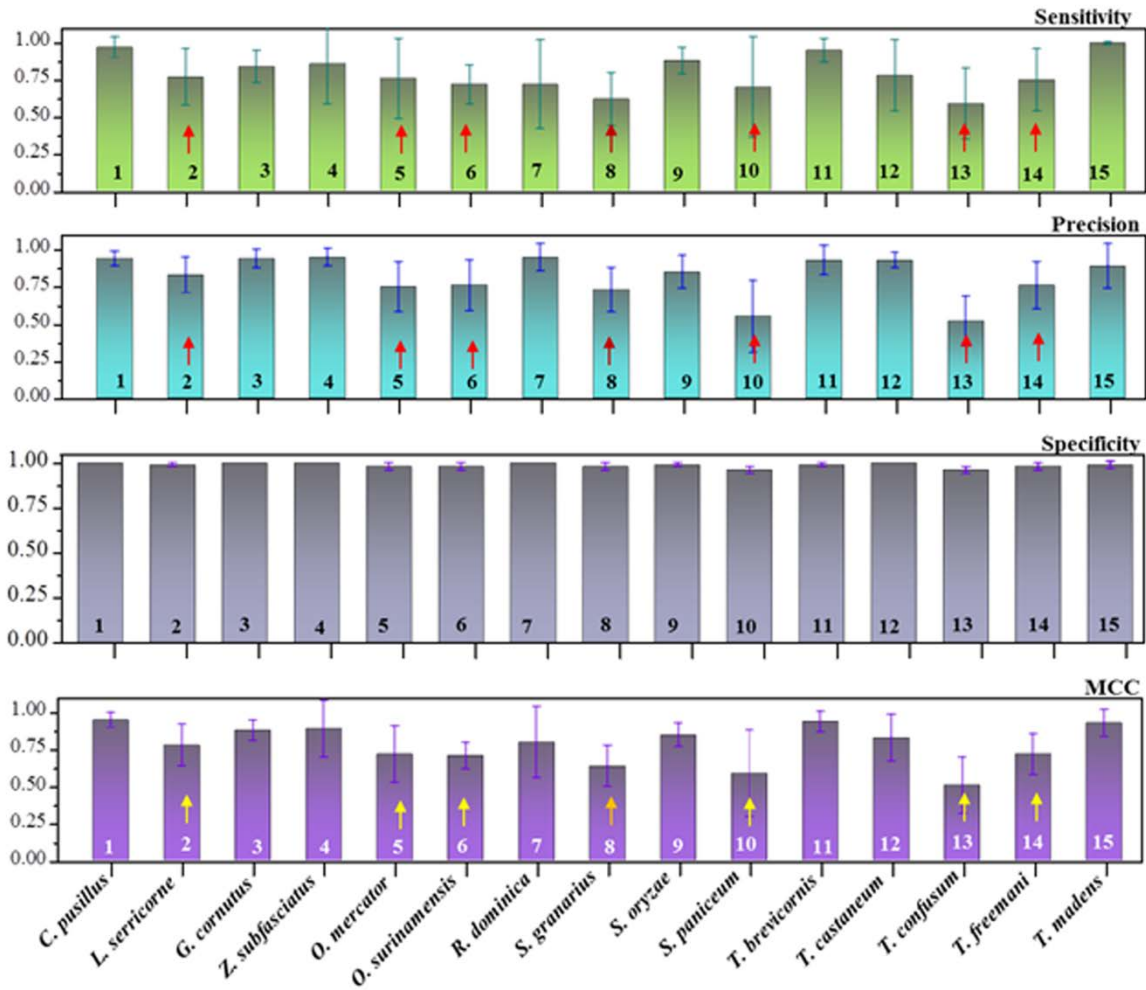

2  
3  
4  
5  
6  
7  
8  
9

Supplementary Figure 1: Classification performance as *Sensitivity*, *Precision*, *Specificity* and *MCC* values for the identification of all 15 species of beetles for ANN method. It can be noted that other than species 2&10; 5&6 (of genus *Oryzaephilus*) and 13&14 (of genus *Tribolium*), species 8 (*S. granarium*) was also performed less accurately in this method.

1 **Table S1:** The feature matrix for 6900 sub-images with numerical species indices in the last  
 2 column, attached as a separate file in zip compressed format.

3  
 4  
 5 **Table S2:** The list of numerical feature indices for 4 feature subsets used to build ANN and  
 6 SVM models. Features #1-#142 are from Global Feature Set 1 (GF1) and color coded in light  
 7 blue. Features #143-#210 are from Global Feature Set 2 (GF2) and color coded in light green.  
 8 Features #211-#625 are from Local Feature Set (LF) and color coded in light brown.  
 9

| <u>CBF</u> | <u>MID 50</u> | <u>MIQ 50</u> | <u>CS</u> |
|------------|---------------|---------------|-----------|
| 1          | 20            | 14            | 1         |
| 3          | 21            | 24            | 3         |
| 5          | 22            | 115           | 5         |
| 163        | 24            | 116           | 14        |
| 164        | 25            | 117           | 20        |
| 174        | 116           | 126           | 21        |
| 177        | 117           | 134           | 22        |
| 187        | 120           | 142           | 24        |
| 196        | 125           | 150           | 25        |
| 205        | 129           | 158           | 115       |
| 206        | 133           | 163           | 116       |
| 207        | 134           | 165           | 117       |
| 208        | 135           | 167           | 120       |
| 210        | 136           | 182           | 125       |
| 223        | 163           | 192           | 126       |
| 250        | 167           | 208           | 129       |
| 278        | 174           | 209           | 133       |
| 294        | 197           | 215           | 134       |
| 305        | 199           | 235           | 135       |
| 352        | 200           | 239           | 136       |
| 365        | 207           | 253           | 142       |
| 372        | 316           | 278           | 150       |
| 374        | 332           | 288           | 158       |
| 375        | 333           | 301           | 163       |
| 378        | 337           | 319           | 164       |
| 379        | 338           | 333           | 165       |
| 382        | 389           | 384           | 167       |
| 383        | 408           | 393           | 174       |
| 404        | 411           | 404           | 177       |
| 407        | 415           | 406           | 182       |
| 408        | 416           | 408           | 187       |

|     |     |     |     |
|-----|-----|-----|-----|
| 410 | 417 | 410 | 192 |
| 411 | 418 | 411 | 196 |
| 414 | 427 | 414 | 197 |
| 417 | 437 | 417 | 199 |
| 431 | 438 | 423 | 200 |
| 437 | 442 | 437 | 205 |
| 438 | 443 | 443 | 206 |
| 439 | 481 | 447 | 207 |
| 442 | 482 | 448 | 208 |
| 443 | 492 | 457 | 209 |
| 446 | 493 | 460 | 210 |
| 447 | 497 | 493 | 215 |
| 449 | 498 | 514 | 223 |
| 450 | 514 | 542 | 235 |
| 494 | 612 | 555 | 239 |
| 521 | 613 | 559 | 250 |
| 538 | 614 | 581 | 253 |
| 550 | 621 | 613 | 278 |
| 551 | 622 | 622 | 288 |
| 591 |     |     | 294 |
| 613 |     |     | 301 |
|     |     |     | 305 |
|     |     |     | 316 |
|     |     |     | 319 |
|     |     |     | 332 |
|     |     |     | 333 |
|     |     |     | 337 |
|     |     |     | 338 |
|     |     |     | 352 |
|     |     |     | 365 |
|     |     |     | 372 |
|     |     |     | 374 |
|     |     |     | 375 |
|     |     |     | 378 |
|     |     |     | 379 |
|     |     |     | 382 |
|     |     |     | 383 |
|     |     |     | 384 |
|     |     |     | 389 |

|  |  |  |     |
|--|--|--|-----|
|  |  |  | 393 |
|  |  |  | 404 |
|  |  |  | 406 |
|  |  |  | 407 |
|  |  |  | 408 |
|  |  |  | 410 |
|  |  |  | 411 |
|  |  |  | 414 |
|  |  |  | 415 |
|  |  |  | 416 |
|  |  |  | 417 |
|  |  |  | 418 |
|  |  |  | 423 |
|  |  |  | 427 |
|  |  |  | 431 |
|  |  |  | 437 |
|  |  |  | 438 |
|  |  |  | 439 |
|  |  |  | 442 |
|  |  |  | 443 |
|  |  |  | 446 |
|  |  |  | 447 |
|  |  |  | 448 |
|  |  |  | 449 |
|  |  |  | 450 |
|  |  |  | 457 |
|  |  |  | 460 |
|  |  |  | 481 |
|  |  |  | 482 |
|  |  |  | 492 |
|  |  |  | 493 |
|  |  |  | 494 |
|  |  |  | 497 |
|  |  |  | 498 |
|  |  |  | 514 |
|  |  |  | 521 |
|  |  |  | 538 |
|  |  |  | 542 |
|  |  |  | 550 |

|  |  |  |     |
|--|--|--|-----|
|  |  |  | 551 |
|  |  |  | 555 |
|  |  |  | 559 |
|  |  |  | 581 |
|  |  |  | 591 |
|  |  |  | 612 |
|  |  |  | 613 |
|  |  |  | 614 |
|  |  |  | 621 |
|  |  |  | 622 |

- 1
- 2
- 3
